# Supplementary material
Source: PubMed Central journal article supplement (PMC3054015)
Supplement: 1011037108_pnas.201011037SI.pdf [file 1011037108_pnas.201011037SI.pdf]

# Supporting Information

Christiansen et al. 10.1073/pnas.1011037108

## SI Materials and Methods

**Tumor Lines.** The BALB/c-derived mammary carcinoma line 4T1.2 was maintained in  $\alpha$ -MEM supplemented with 10% (vol/vol) heat-inactivated FCS, 2 mM L-glutamine, 10 mM HEPES, and 2 mM penicillin/streptomycin at 37 °C with a 10% CO<sub>2</sub> atmosphere. The BALB/c-derived renal carcinoma, Renca, were maintained in RPMI 1640 supplemented with 10% (vol/vol) heat-inactivated FCS, 2 mM L-glutamine, 10 mM HEPES, and 2 mM penicillin/streptomycin at 37 °C with a 5% CO<sub>2</sub> atmosphere. The C57BL/6-derived colon adenocarcinoma MC38, the retrovirally transduced lines MC38/MSCV, MC38/Bcl-2, and MC38/c-FLIPL, and the RM1 prostate adenocarcinoma line were maintained in DMEM supplemented with 10% (vol/vol) heat-inactivated FCS, 2 mM L-glutamine, 10 mM HEPES, and 2 mM penicillin/streptomycin at 37 °C with a 10% CO<sub>2</sub> atmosphere.

**Mice and in Vivo Experiments.** All mice used in experiments were 6–12 wk of age and were housed under specific pathogen-free conditions with food and water freely available according to the Peter MacCallum Cancer Centre Animal Experimental Ethics Committee Guidelines. BALB/c and C57BL/6 mice were purchased from the Walter and Eliza Hall Medical Research Institute and TRAIL<sup>-/-</sup>, perforin<sup>-/-</sup> Rag1<sup>-/-</sup>, and Rag2<sup>-/-</sup>c- $\gamma$ -chain<sup>-/-</sup> mice were bred in-house at the Peter MacCallum Cancer Centre.

Vorinostat was administered i.p. at 150 or 100 mg·kg<sup>-1</sup>·d<sup>-1</sup>. Panobinostat was administered at either 10 mg/kg (CT-26, RM1) or 5 mg/kg (4T1.2 experiment) every day for 5 d, followed by a 2 d break, then again for 5 d. Therapeutic antibodies (anti-CD40 and anti-CD137) were administered i.p. at the following doses unless otherwise stated in the figure legend. MD5-1 at 50  $\mu$ g, administered every 4 d for 4 doses; BimAb (25  $\mu$ g anti-CD40, 100  $\mu$ g anti-CD137) administered every 4 d for 4 doses;  $\alpha$ -c-GC was synthesized as described (1, 2) and mice administered 500 ng every 4 d as per therapeutic antibody schedule (3). The depletion antibodies anti-CD4 (clone GK1.5) anti-CD8 (clone 53–6.7), and anti-asialo GM1 were administered at 100  $\mu$ g/dose the day before V/bimAb therapy commenced, the day of therapy and every 4 d until completion of the experiment. Depletion of cell subsets

was confirmed via assessment of the peripheral blood of treated mice via flow cytometry.

**Retroviral Transduction of MC38 Cells.** Retrovirus-containing supernatants were produced by transiently transfecting HEK-293T packaging cell line with 10  $\mu$ g of MScV/empty vector, MScV/c-FLIPL, or MScV/Bcl-2 plasmid DNA (all combined with 10  $\mu$ g amphotrophic helper plasmid DNA) by standard calcium phosphate transfection techniques. Forty-eight hours after transfection, supernatants containing the retrovirus were collected, filtered through a 0.45- $\mu$ m filter, aliquoted, and stored at –80 °C. MC38 colon adenocarcinoma cells ( $1 \times 10^5$ ) in complete media were plated into a single well of a six-well tissue culture plate. Cells were incubated (37 °C, 5% CO<sub>2</sub>) for at least 4 h to allow cells to adhere before complete media was removed and replaced with 1.5 mL of retrovirus-containing supernatants and polybrene (4  $\mu$ g/mL). Supernatants were replaced every 12 h with exposure of tumor cells to a total of six retroviral preparations. Following further culture and expansion, GFP-positive cells were then isolated by flow cytometry-mediated cell sorting, further cultured, and then resorted at least twice more to enrich the GFP-positive population of cells.

**Western Blotting.** Immunoblotting was performed as per standard established Western blotting techniques. Thirty micrograms of whole cell tumor lysates were separated by PAGE using 15% polyacrylamide gels in SDS running buffer (25 mM Tris-HCl, 192 mM glycine, 0.1% SDS in H<sub>2</sub>O). Proteins were transferred to Immobilon-P PVDF membrane (Millipore) by electroblotting in Western transfer buffer (25 mM Tris-HCl, pH 8.3, 192 mM glycine, 20% vol/vol methanol) in a wet transfer apparatus. Bcl-2 or c-FLIPL were detected on the membrane using anti-Bcl-2 (Clone 3F11; BD Biosciences) or anti-c-FLIP (Clone Dave-2; Alexis), respectively.

**Statistical Analysis.** Statistical significance was assessed using Prism or Microsoft Excel software. For comparisons of means, Student *t* test (parametric data) or Mann-Whitney rank sum test (non-parametric data) were used. In all cases, *P* < 0.05 was considered significant.

1. Chen G, Chien M, Tsuji M, Franck RW (2006) E and Z alpha-C-galactosylceramides by Julia-Lythgoe-Kocienski chemistry: a test of the receptor-binding model for glycolipid immunostimulants. *ChemBioChem* 7:1017–1022.
2. Yu KO, et al. (2005) Modulation of CD1d-restricted NKT cell responses by using N-acyl variants of alpha-galactosylceramides. *Proc Natl Acad Sci USA* 102:3383–3388.

3. Teng MW, et al. (2007) Combined natural killer T-cell based immunotherapy eradicates established tumors in mice. *Cancer Res* 67:7495–7504.

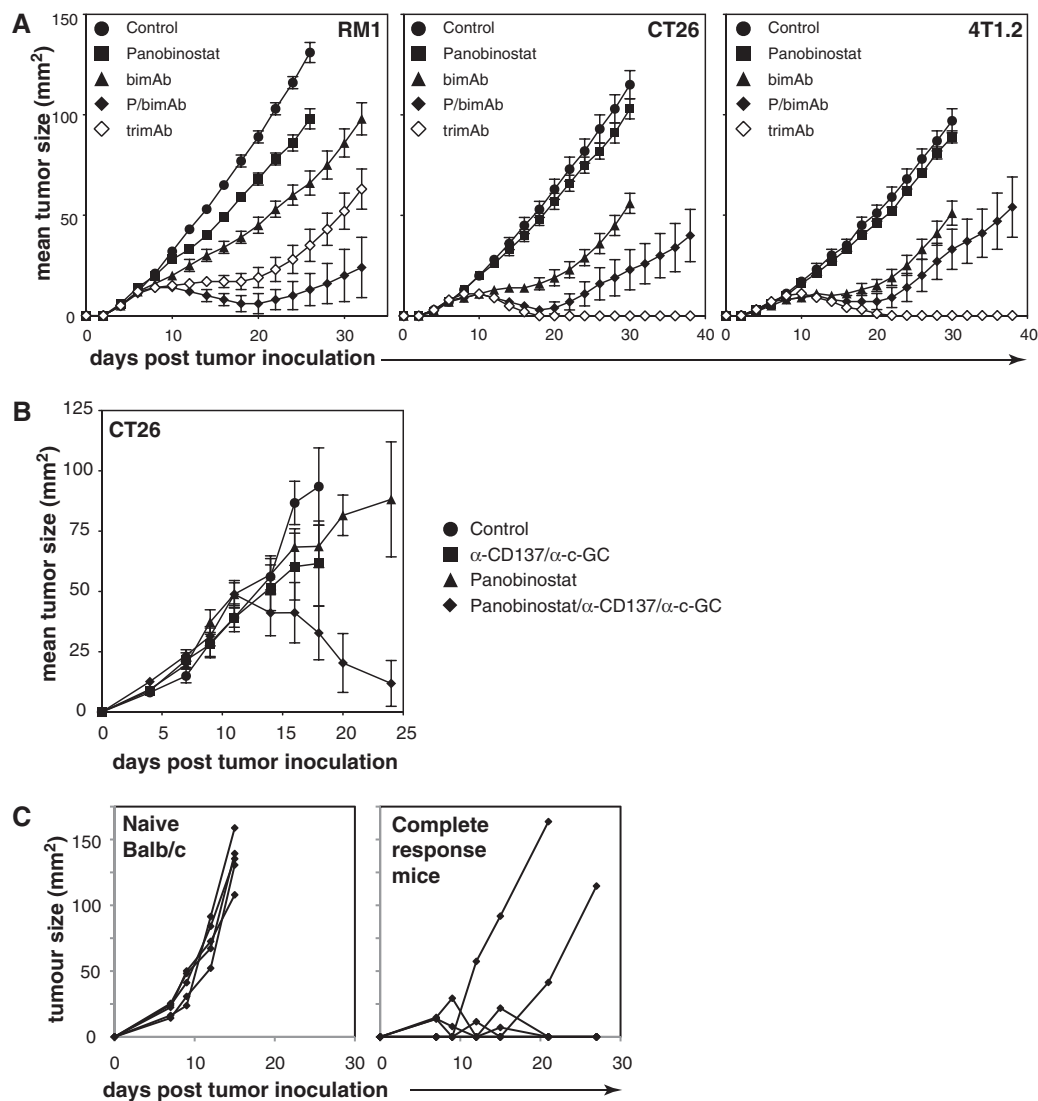

**Fig. S1.** P/bimAb and P/α-CD137/α-c-GC therapy are efficacious against established carcinomas. (A) Cohorts of mice with established (>9 mm<sup>2</sup>) s.c. carcinoma (RM1, CT26, or 4T1.2) were treated i.p. with 10 mg/kg (RM1 and CT26) or 5 mg/kg (4T1.2) panobinostat for 5 d followed by a 2-d break. BimAb (100 μg α-CD137, 25 μg α-CD40) or trimAb (50 μg MD5-1, 100 μg α-CD137, 25 μg α-CD40) was administered every 4 d for 4 doses. Tumor growth was assessed every 2 d; mean tumor size ± SEM are shown and are representative of two independent experiments. Complete tumor regressions were observed in 60, 40, and 20% of P/bimAb-treated mice bearing RM1, CT26, or 4T1.2 tumors, respectively. (B) Mice with established CT26 (>9 mm<sup>2</sup>) were treated with panobinostat (7.5 mg/kg) every 5 d followed by a 2-d break, α-CD137 and α-c-GC (100 μg and 500 ng, respectively) every 4 d, or a combination of all three reagents. Tumor growth was assessed every 2–3 d; mean tumor size ± SEM are shown and are representative of two independent experiments (C). Mice that achieved complete tumor regressions (CT26, from B) when treated with P/bimAb were rechallenged on the opposite hind flank with  $2 \times 10^5$  CT26 carcinoma cells, and tumor growth was assessed compared with naïve BALB/c mice. Tumors spontaneously regressed in 7/9 rechallenge mice, demonstrating P/bimAb therapy facilitates the generation of long-term immunological memory.

**RM1 Cells**

Mean tumor size (cm<sup>2</sup>)

Days post tumor inoculation

Legend:

- C57BL/6 - P/bimAb
- RAG1<sup>-/-</sup> - P/bimAb
- ▲ pfp<sup>-/-</sup> - P/bimAb
- ◆ IFNγ<sup>-/-</sup> - P/bimAb
- ▼ WT + αCD8 - P/bimAb

| Days post tumor inoculation | C57BL/6 - P/bimAb | RAG1 <sup>-/-</sup> - P/bimAb | pfp <sup>-/-</sup> - P/bimAb | IFNγ <sup>-/-</sup> - P/bimAb | WT + αCD8 - P/bimAb |
|-----------------------------|-------------------|-------------------------------|------------------------------|-------------------------------|---------------------|
| 0                           | 0.00              | 0.00                          | 0.00                         | 0.00                          | 0.00                |
| 5                           | 0.05              | 0.05                          | 0.05                         | 0.05                          | 0.05                |
| 10                          | 0.15              | 0.20                          | 0.20                         | 0.20                          | 0.20                |
| 15                          | 0.10              | 0.35                          | 0.35                         | 0.35                          | 0.35                |
| 20                          | 0.05              | 0.50                          | 0.50                         | 0.50                          | 0.50                |
| 25                          | 0.05              | 0.65                          | 0.65                         | 0.65                          | 0.65                |
| 30                          | 0.15              | 0.80                          | 0.80                         | 0.80                          | 0.80                |
| 35                          | 0.20              | 0.90                          | 0.90                         | 0.90                          | 0.90                |

3 of 4

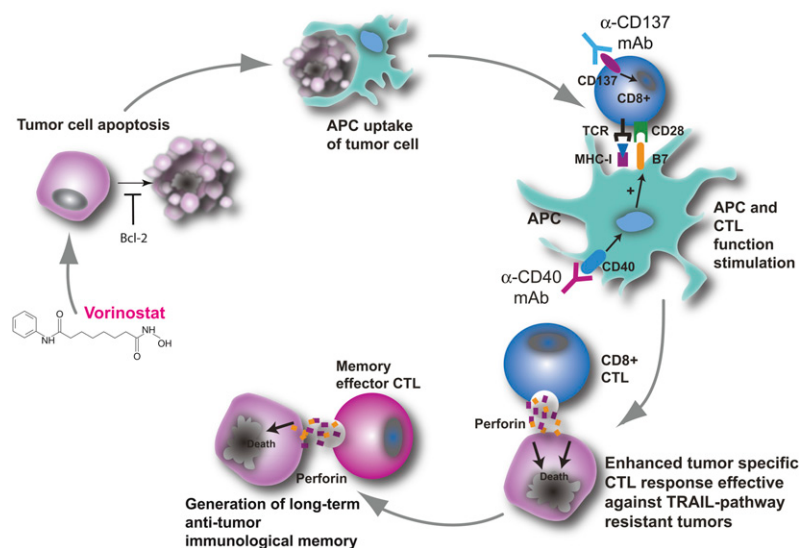

**Fig. S4.** Proposed mechanism of V/bimAb therapy. V/bimAb therapy induces a potent antitumor response capable of the eradication of established carcinomas of diverse tissue origins. Vorinostat-induced apoptosis is critical for efficacy of V/bimAb therapy. Vorinostat-induced apoptosis facilitates uptake and processing of tumor cells by APCs. The immunostimulating agonistic antibodies anti-CD40 and anti-CD137 promote APC activation and CTL proliferation and survival such that a potent antitumor CTL response capable of the eradication of established solid tumors. Tumor-specific CTLs critically rely on the membrane-disrupting protein perforin for tumor eradication. Importantly, V/bimAb therapy also induces the generation of long-term antitumor immunological memory capable of the spontaneous eradication of tumors upon secondary challenge.
